# Supplementary material
Source: publisher figshare collection journal article supplement (https://acs.figshare.com/ndownloader/files/9410518)
Supplement: Supplementary file 1 [file 9410518]

## Supporting Information

### Improving Alkene Selectivity of Nanocarbon Catalyzed Oxidative Dehydrogenation of *n*-Butane by Refinement of Oxygen Species

Jiaquan Li,<sup>†</sup> Peng Yu,<sup>†</sup> Jingxin Xie,<sup>†</sup> Jie Liu,<sup>†</sup> Zehua Wang,<sup>†</sup> Chongchong Wu,<sup>†</sup>  
Junfeng Rong<sup>\*,†</sup>, Hongyang Liu,<sup>‡</sup> and Dangsheng Su<sup>\*,§</sup>.

<sup>†</sup>Research Institute of Petroleum Processing, Sinopec, No.18, Xueyuan Road,  
Haidian District, Beijing, 100083, China.

<sup>‡</sup>Shenyang National Laboratory for Materials Science, Institute of Metal Research,  
Chinese Academy of Sciences, Wenhua Road 72, Shenyang, 110016, China.

<sup>§</sup>Dalian National Laboratory for Clean Energy, Dalian Institute of Chemical Physics,  
Chinese Academy of Sciences, 457 Zhongshan Road, Dalian, 116023, China.

\* To whom correspondence should be addressed.

Email: [rongjf.ripp@sinopec.com](mailto:rongjf.ripp@sinopec.com); [dssu@dicp.ac.cn](mailto:dssu@dicp.ac.cn)

**Table S1.** O/C weight content ratio of o-CNT, oCNT-LiAlH<sub>4</sub> and o-CNT under different annealing temperatures before and after ODH of butane.

| Samples                 | O/C weight ratio |           |
|-------------------------|------------------|-----------|
|                         | Before ODH       | After ODH |
| o-CNT                   | 0.169            | 0.036     |
| oCNT-LiAlH <sub>4</sub> | 0.060            | 0.054     |
| oCNT-500                | 0.034            | 0.031     |
| oCNT-700                | 0.009            | 0.032     |
| oCNT-900                | 0.004            | 0.017     |
| oCNT-1100               | 0.003            | 0.020     |

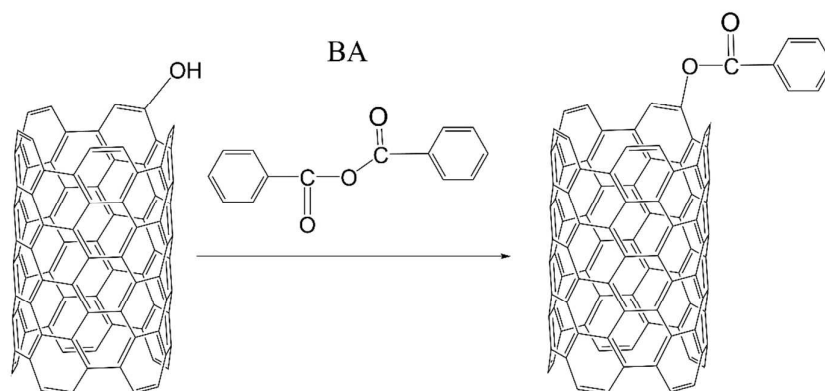

**Scheme S1.** Selective deactivation of phenol groups on CNTs by benzoic anhydride (BA).

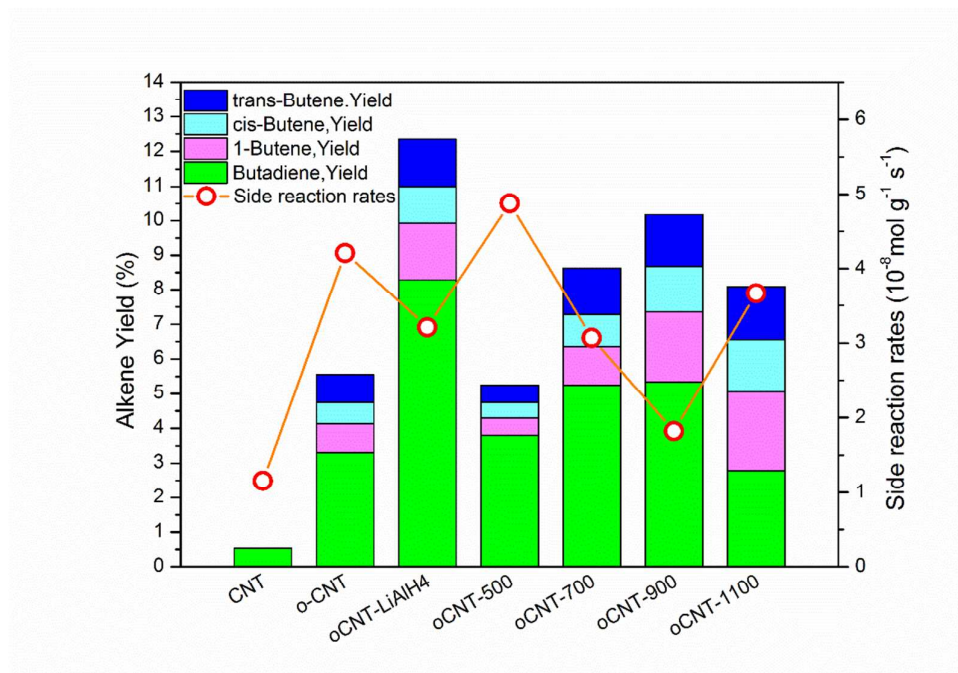

**Figure S1.** C<sub>4</sub> alkene yield and side-reaction rates of pristine CNTs, o-CNT, oCNT-LiAlH<sub>4</sub>, oCNT-500, oCNT-700, oCNT-900 and oCNT-1100. The ODH reaction conditions: 723 K, 1 atm, O<sub>2</sub>/butane=2.

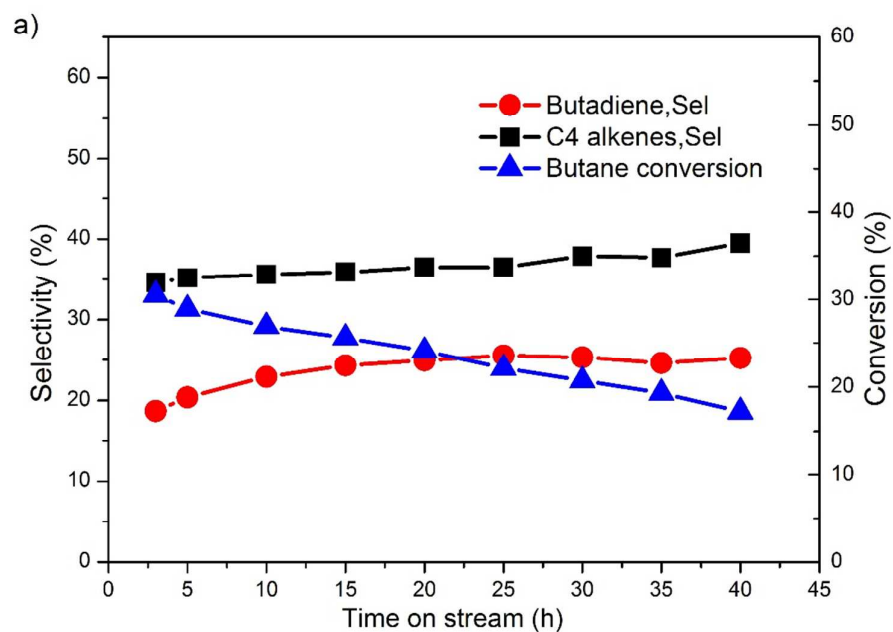

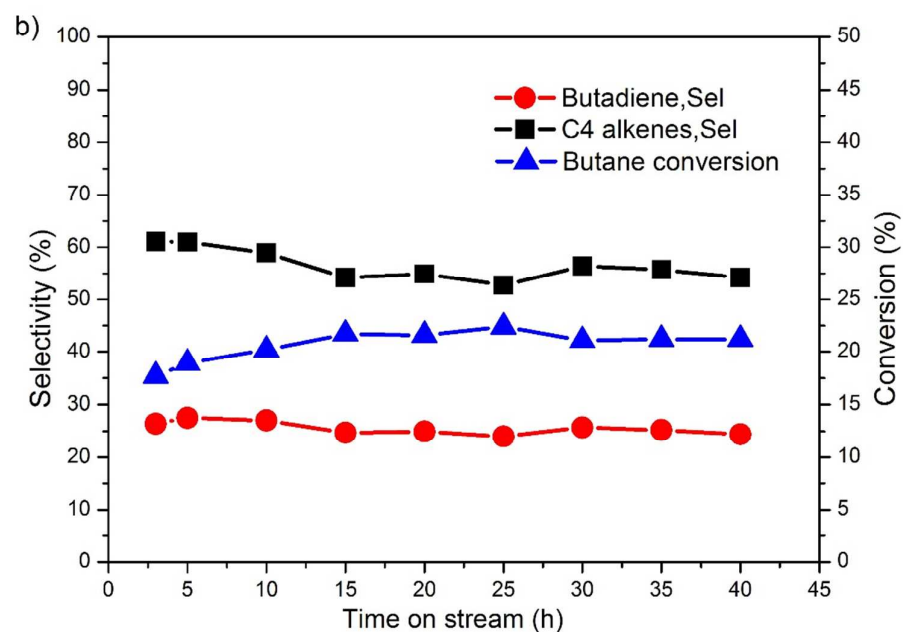

**Figure S2.** Stability of a) oCNT-LiAlH<sub>4</sub> and b) oCNT-900 for ODH of butane over 40 hours. There is 55 % catalyst weight loss of catalyst of oCNT-LiAlH<sub>4</sub> after 40 hours while the catalytic performance of oCNT-900 is highly stable. The ODH reaction conditions: 723 K, 1 atm, O<sub>2</sub>/butane=2.

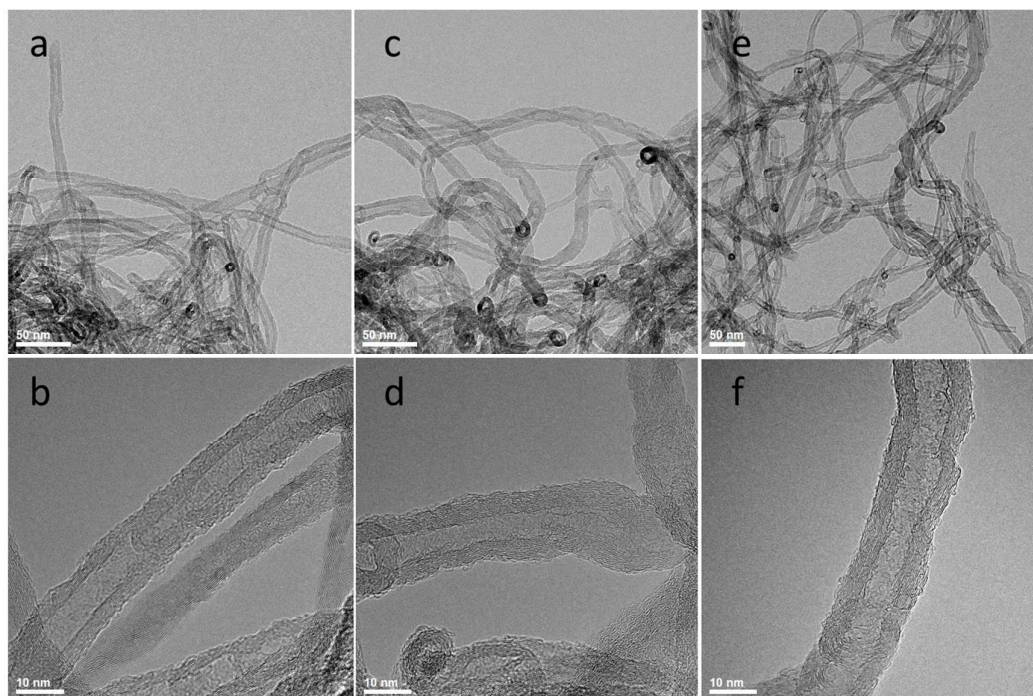

**Figure S3.** TEM images of o-CNT ( a, b ), oCNT-LiAlH<sub>4</sub> ( c, d ) and oCNT-900 ( e, f ).

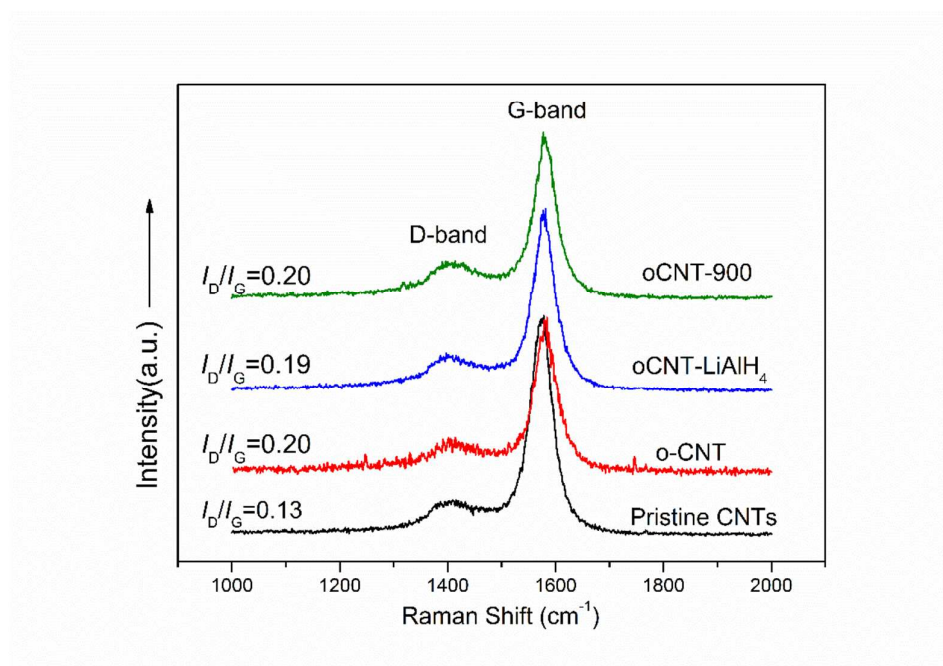

**Figure S4.** Raman spectra of pristine CNTs, o-CNT, oCNT-LiAlH<sub>4</sub> and oCNT-900.

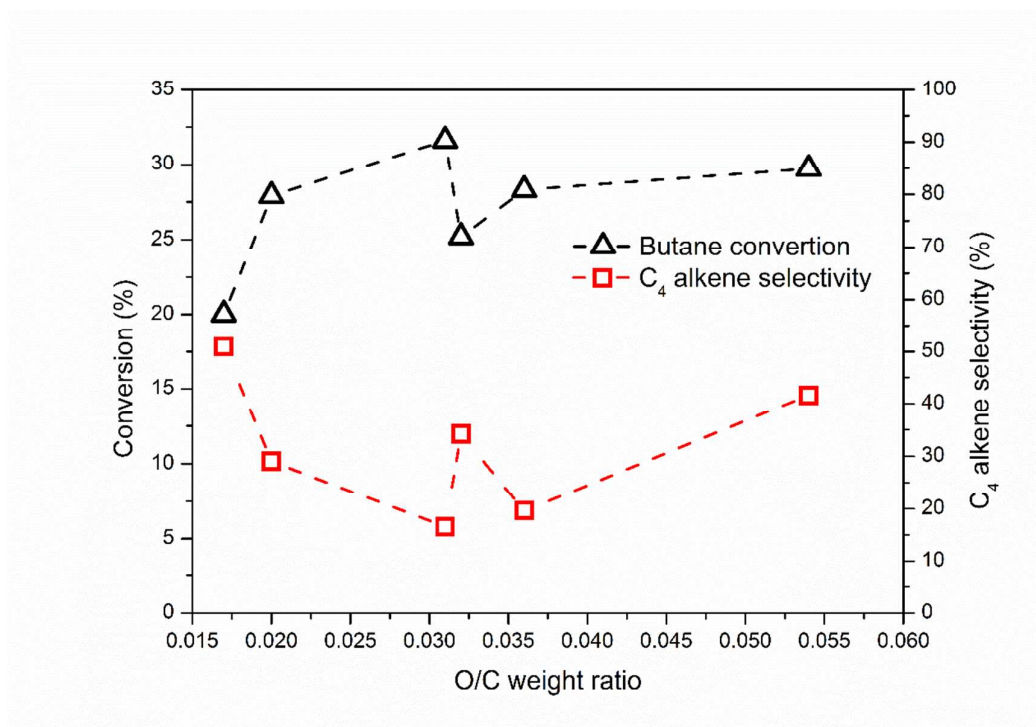

**Figure S5.** Catalytic performance of CNTs catalysts with different O/C weight content ratio. The samples involved: o-CNT, oCNT-LiAlH<sub>4</sub>, oCNT-500, oCNT-700, oCNT-900 and oCNT-1100.



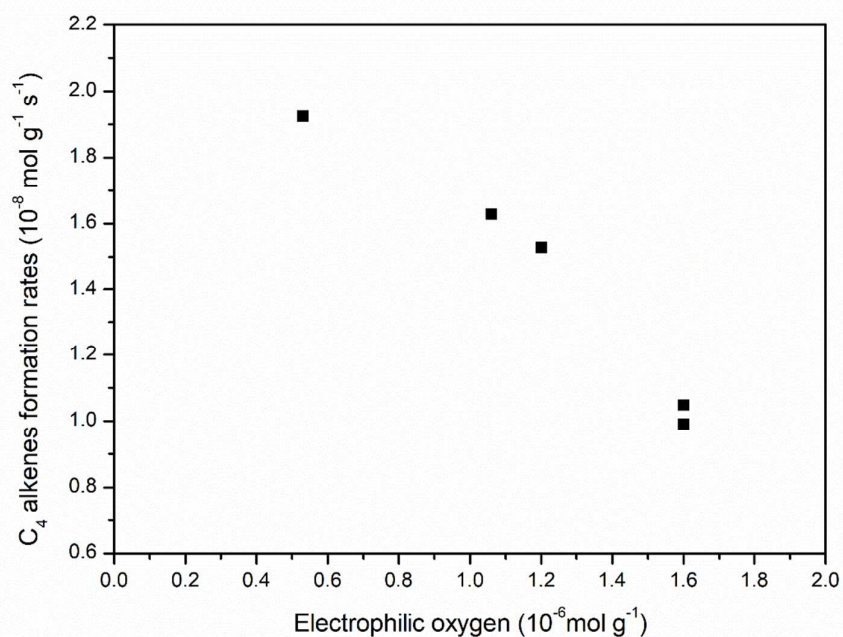

**Figure S6.** C<sub>4</sub> alkenes formation rates on CNTs samples with different amount of electrophilic oxygen after ODH of *n*-butane (the samples include o-CNT, oCNT-500, oCNT-700, oCNT-900 and oCNT-1100). The ODH reaction conditions: 723 K, 1 atm, O<sub>2</sub>/butane=2.

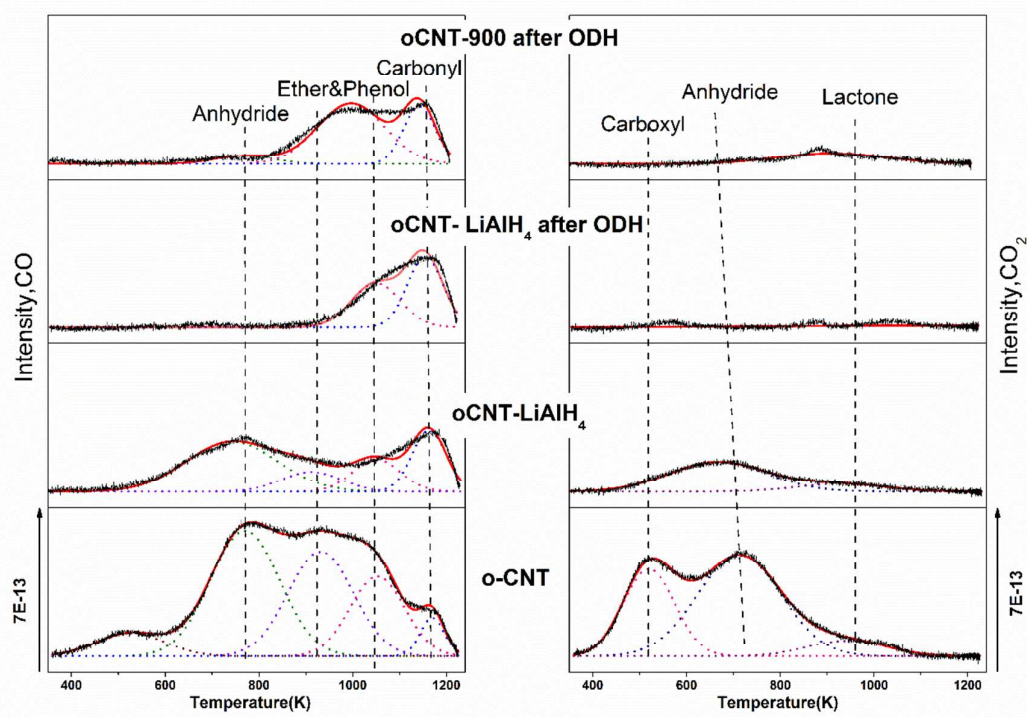

**Figure S7.** Deconvolution of TPD profiles for CO ( left ) and CO<sub>2</sub> ( right ) desorption of the following samples: o-CNT, oCNT-LiAlH<sub>4</sub>, oCNT-LiAlH<sub>4</sub> and oCNT-900 after ODH of butane.

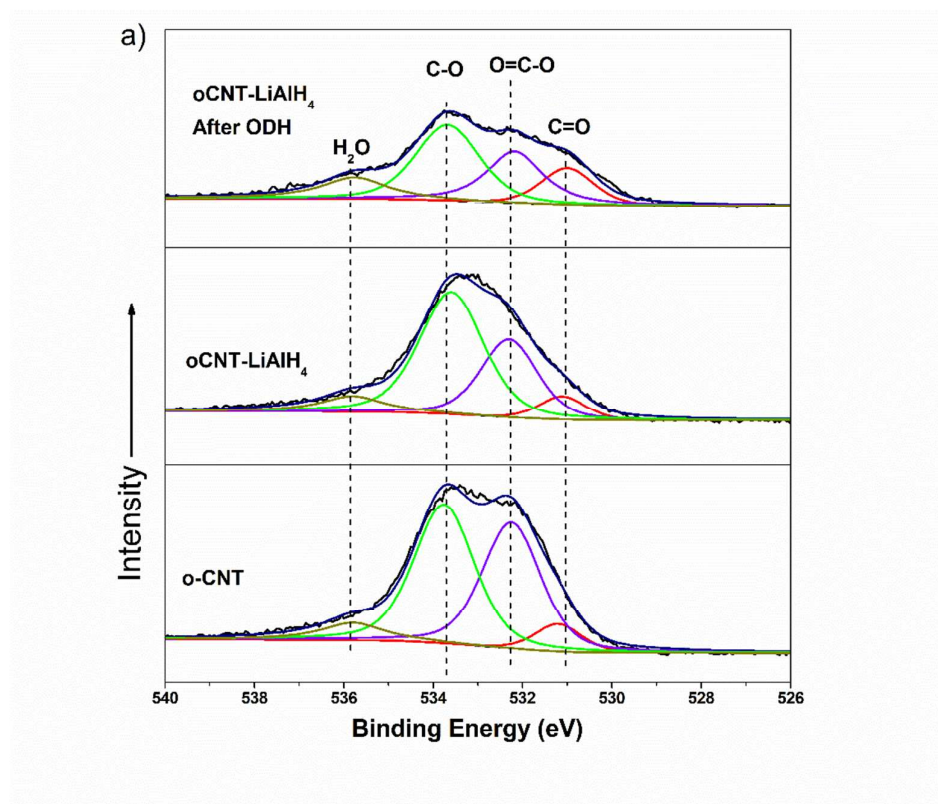

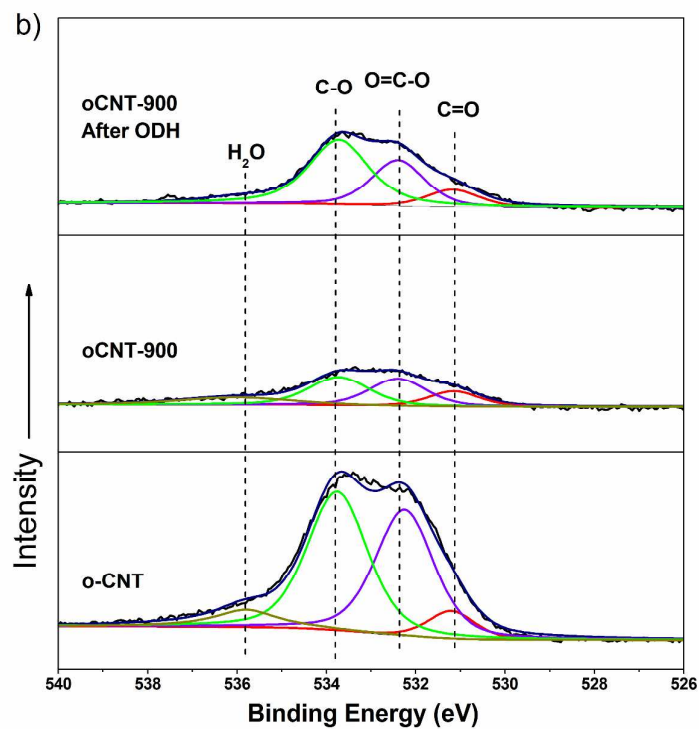

**Figure S8.** Deconvolution of O1s XPS spectra of a) o-CNT and oCNT-LiAlH<sub>4</sub> before and after ODH b) o-CNT and oCNT-900 before and after ODH.

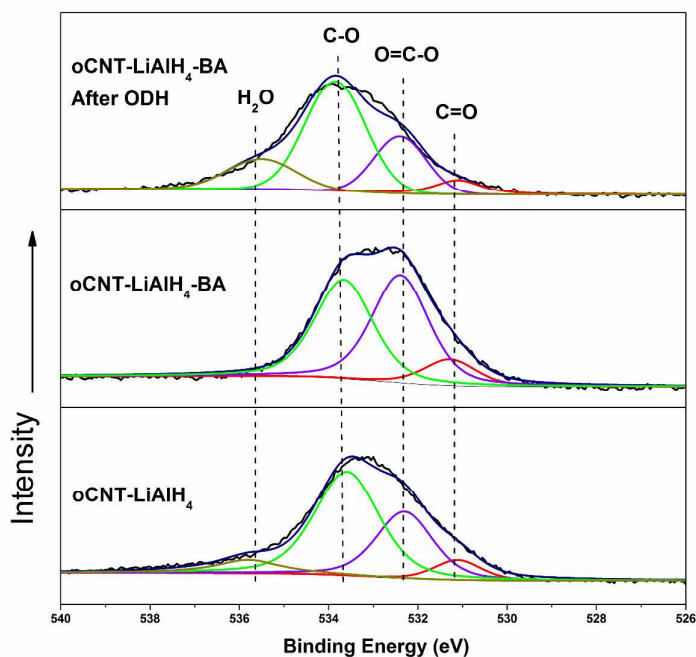

**Figure S9.** Deconvolution of O1s XPS spectra of oCNT-LiAlH<sub>4</sub> and oCNT-LiAlH<sub>4</sub>-BA.



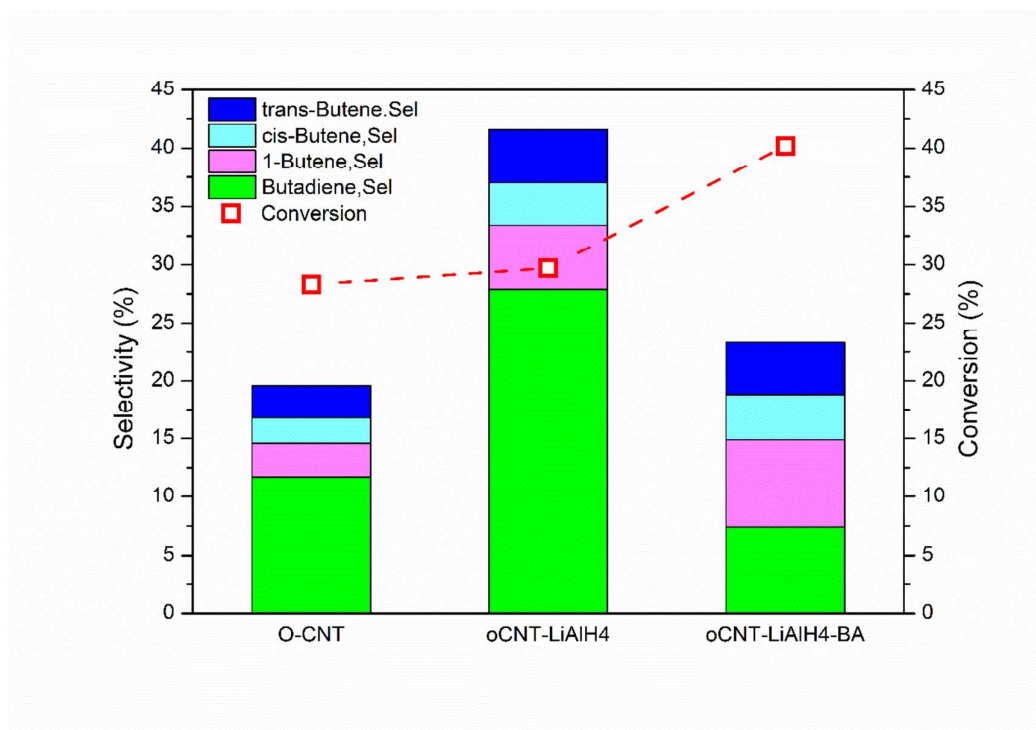

**Figure S10.** ODH activities of o-CNT, oCNT-LiAlH<sub>4</sub> and oCNT-LiAlH<sub>4</sub>-BA.
